# Supplementary material for: Zeolitic imidazolate framework derived ZnCo2O4 hollow tubular nanofibers for long-life supercapacitors
Source: Royal Society of Chemistry journal article supplement (doi:10.1039/d0ra01844a), 2020-01-01
Supplement: d0ra01844a1.pdf [file d0ra01844a1.pdf]

## Supporting Information

### Zeolitic imidazolate frameworks derived ZnCo<sub>2</sub>O<sub>4</sub> hollow tubular nanofibers for long-life supercapacitors

Shihang Zhao,<sup>a</sup> Xianbo Yu,<sup>a</sup> Hongmei Chen,<sup>a</sup> Kai Tao,<sup>a</sup> Yaoping Hu<sup>a</sup> and Lei Han<sup>a,b,\*</sup>

<sup>a</sup>School of Materials Science & Chemical Engineering, Ningbo University, Ningbo, Zhejiang 315211, China. E-mail: hanlei@nbu.edu.cn (L. Han).

<sup>b</sup>Key Laboratory of Photoelectric Materials and Devices of Zhejiang Province, Ningbo University, Ningbo, Zhejiang 315211, China.

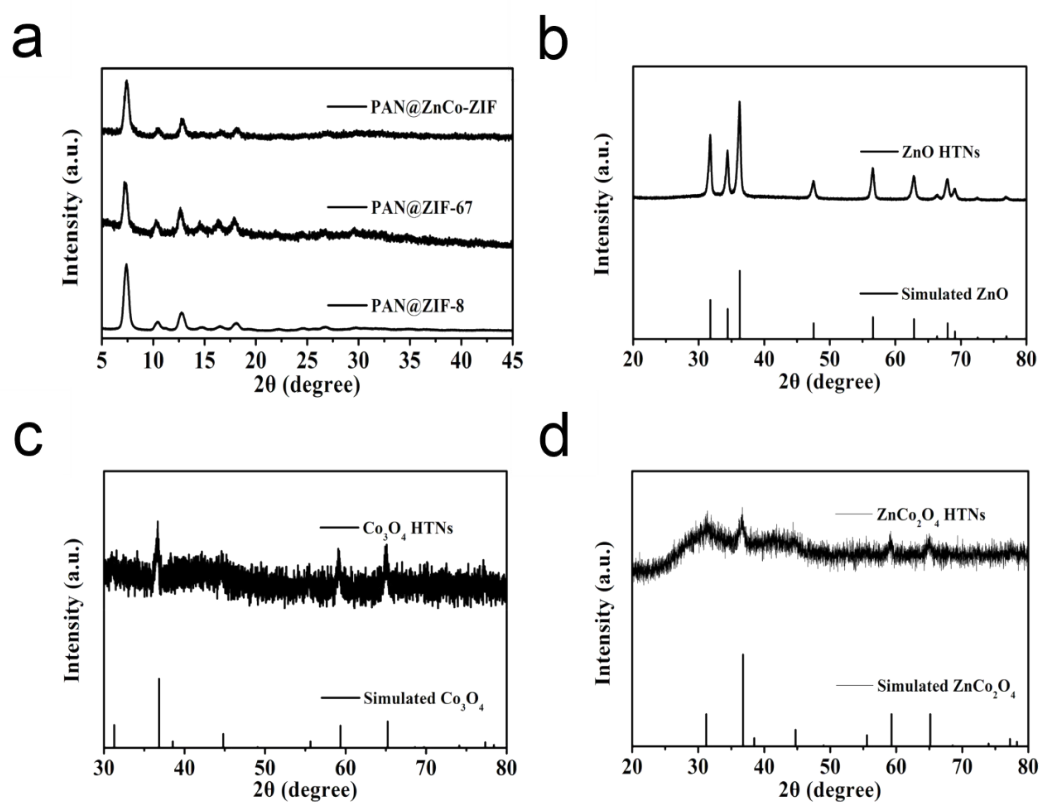

**Fig S1.** XRD patterns of (a) PAN@ZIF-8, PAN@ZIF-67 and PAN@ZnCo-ZIF, (b) ZnO HTNs, (c) Co<sub>3</sub>O<sub>4</sub> HTNs, (d) ZnCo<sub>2</sub>O<sub>4</sub> HTNs.

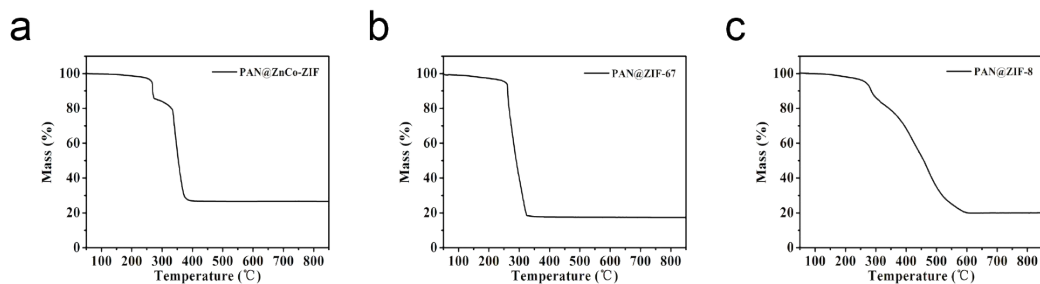

**Fig S2.** TGA curves of (a) PAN@ZnCo-ZIF, (b) PAN@ZIF-8 and (C) PAN@ZIF-67.

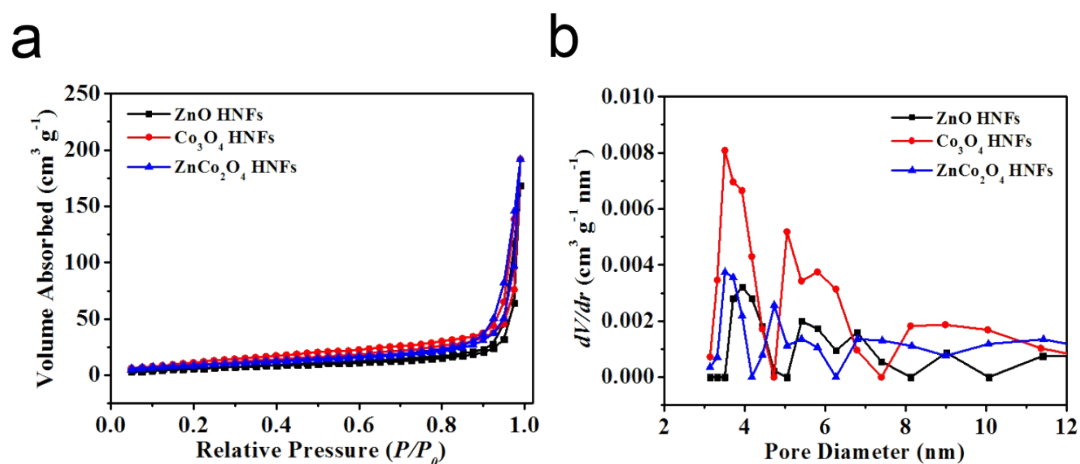

**Fig S3.** Nitrogen adsorption-desorption isotherms (a) and corresponding pore-size distribution curves (b) of ZnCo<sub>2</sub>O<sub>4</sub> HTNs, ZnO HTNs and Co<sub>3</sub>O<sub>4</sub> HTNs. (The pore size distribution of ZnO HTNs and Co<sub>3</sub>O<sub>4</sub> HTNs are concentrated at 4 nm and 3.5 nm, and the specific surface area are 23.852 m<sup>2</sup> g and 38.979 m<sup>2</sup> g, respectively.)

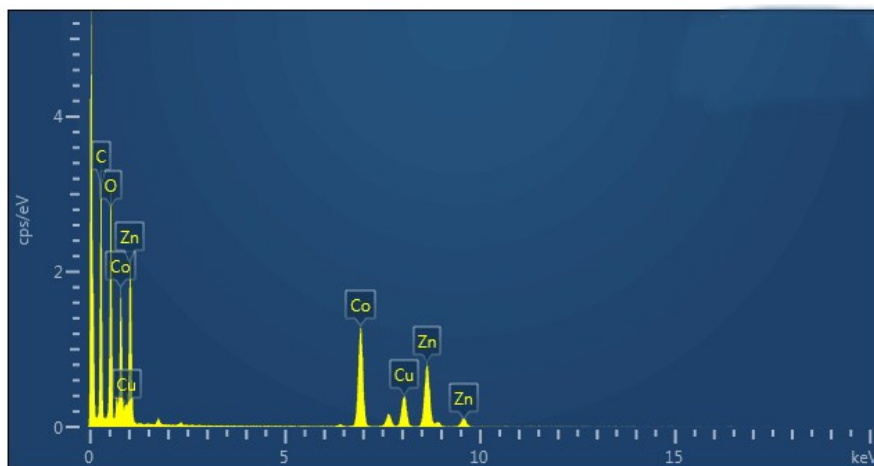

**Fig S4.** EDX image of  $\text{ZnCo}_2\text{O}_4$  HTNs.

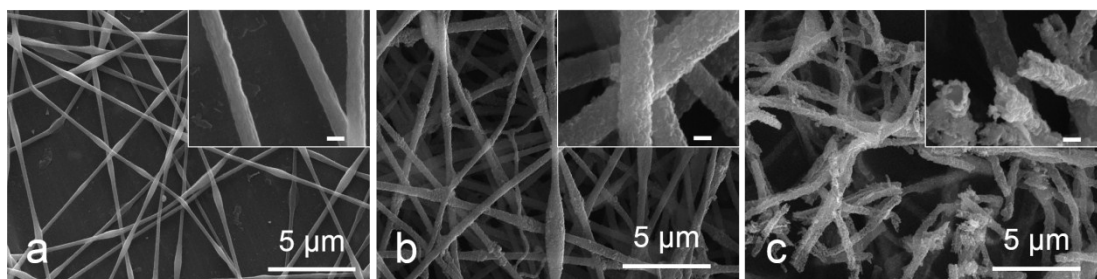

**Fig S5.** SEM images of (a)  $\text{PAN@Zn(Ac)}_2$  composite nanofibers; (b)  $\text{PAN@ZIF-8}$  core-shell nanofibers and (c)  $\text{ZnO}$  HTNs. Scale bars in inset are 200 nm.

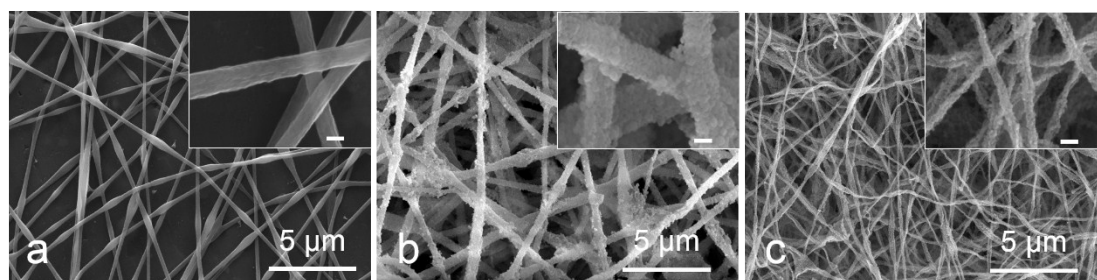

**Fig S6.** SEM images of (a)  $\text{PAN@Co(Ac)}_2$  composite nanofibers; (b)  $\text{PAN@ZIF-67}$  core-shell nanofibers and (c)  $\text{Co}_3\text{O}_4$  HTNs. Scale bars in inset are 200 nm.

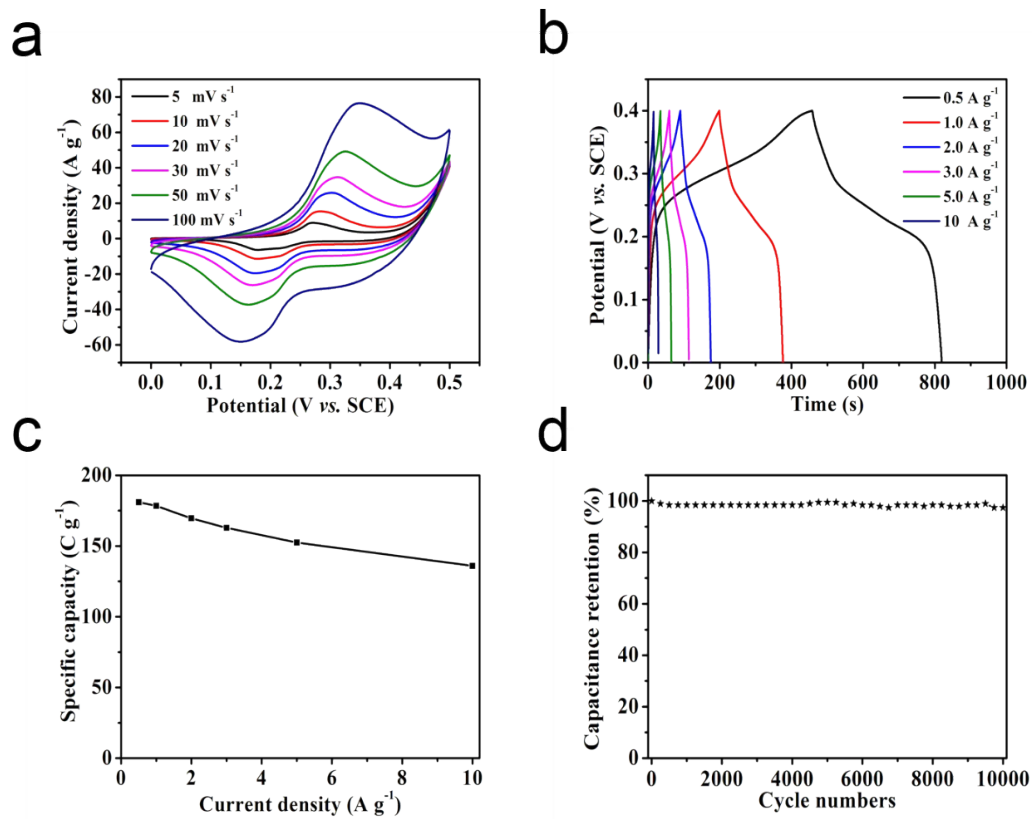

**Fig S7.** Electrochemical performance of ZnCo<sub>2</sub>O<sub>4</sub> HTNs: (a) CV curves at different scan rates; (b) GCD curves at different current densities; (c) specific capacity at different current densities; (d) cycling performance at current density of 5 A g<sup>-1</sup>.

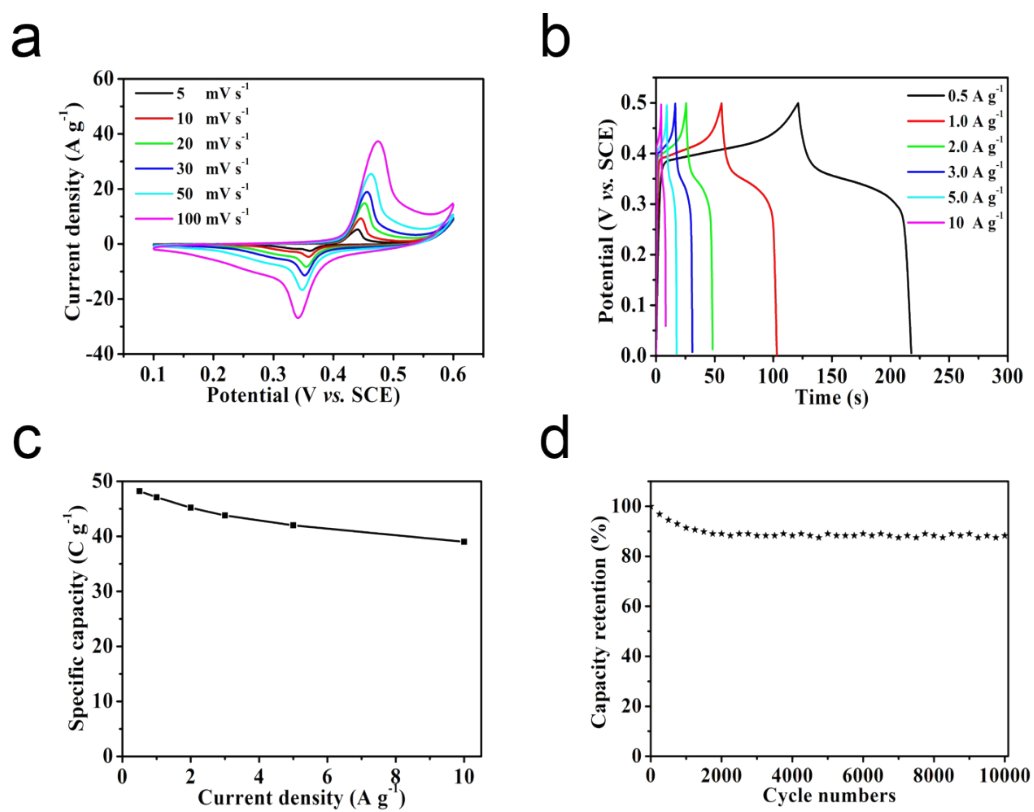

**Fig S8.** Electrochemical performance of ZnO HTNs: (a) CV curves at different scan rates; (b) GCD curves at different current densities; (c) specific capacity at different current densities; (d) cycling performance at current density of 5  $\text{A g}^{-1}$ .

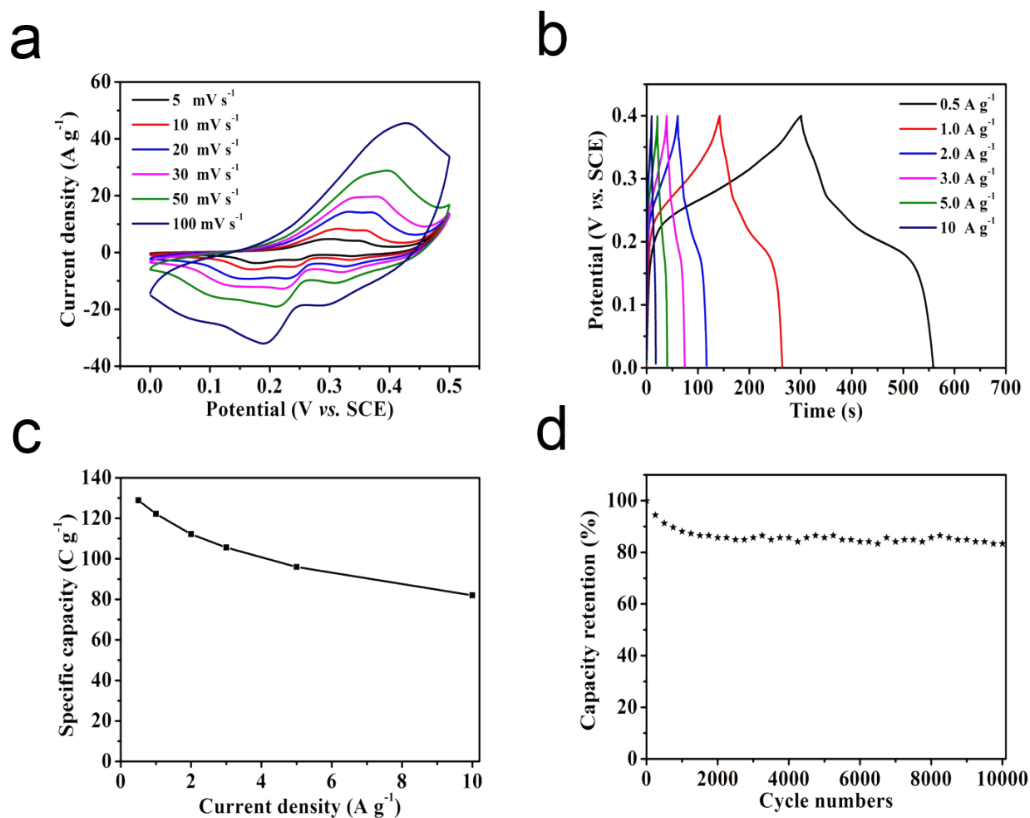

**Fig S9.** Electrochemical performance of  $\text{Co}_3\text{O}_4$  HTNs: (a) CV curves at different scan rates; (b) GCD curves at different current densities; (c) specific capacity at different current densities; (d) cycling performance at current density of 5  $\text{A g}^{-1}$ .

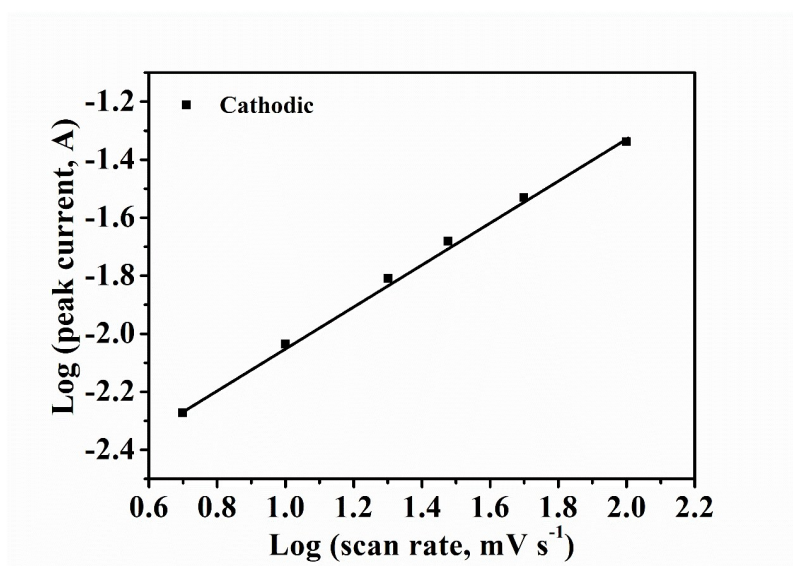

**Fig S10.** The plots of  $\log(i)$  against  $\log(v)$  of  $\text{ZnCo}_2\text{O}_4$  HTNs.

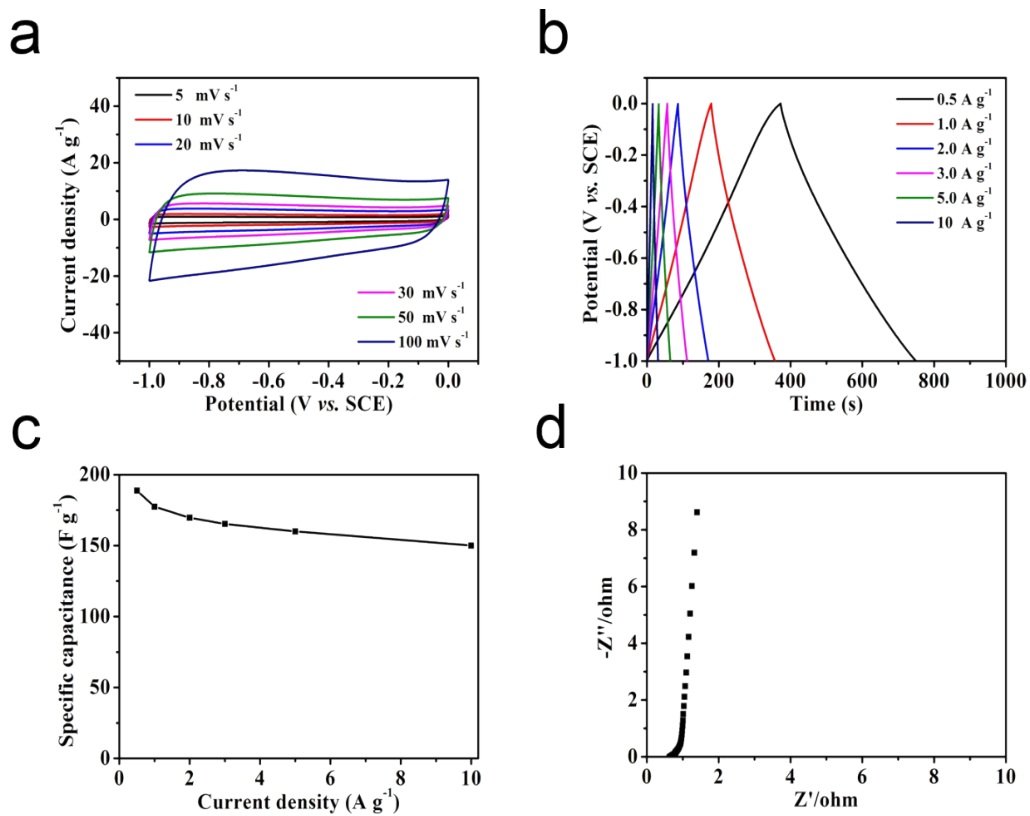

**Fig S11.** Electrochemical performance of AC: (a) CV curves at different scan rates; (b) GCD curves at different current densities; (c) specific capacitance at different current densities; (d) EIS spectra in Nyquist plots.

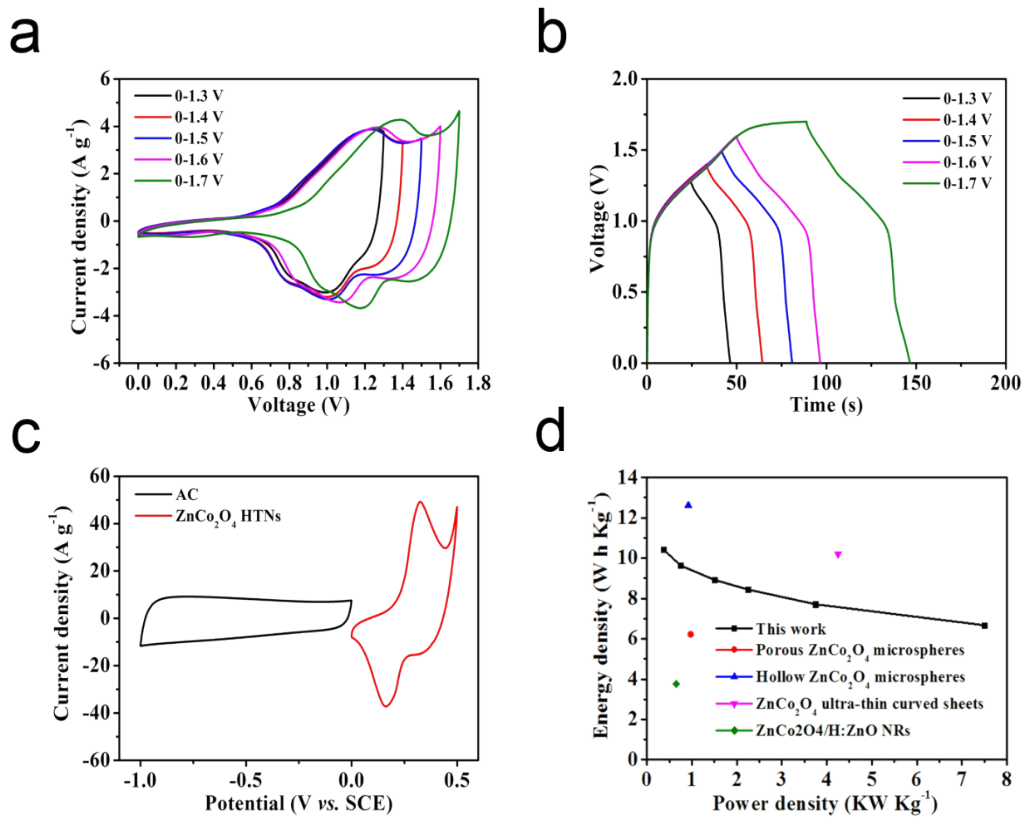

**Fig S12.** (a) CV curves with different voltage windows at the same scan rate of 50 mV s<sup>-1</sup>; (b) GCD curves with different voltage windows at the same current density of 1 A g<sup>-1</sup>; (c) CV curves of ZnCo<sub>2</sub>O<sub>4</sub> HTNs and AC electrodes at the scan rate of 50 mV s<sup>-1</sup>; (d) Ragone Plot of the ZnCo<sub>2</sub>O<sub>4</sub> HTNs//AC ASC, in comparison with report data.



**Tabel S1.** Electrochemical performance comparison of ZnCo<sub>2</sub>O<sub>4</sub> HTNs with related materials previously reported in supercapacitors.

| Electrode                                      | C (C g <sup>-1</sup> ) | Current density       | Cycle performance<br>(cycle numbers) | Ref.             |
|------------------------------------------------|------------------------|-----------------------|--------------------------------------|------------------|
| ZnCo <sub>2</sub> O <sub>4</sub> nanoparticles | 182.8                  | 1 A g <sup>-1</sup>   | 97.9% (1500)                         | S1               |
| ZnCo <sub>2</sub> O <sub>4</sub> microspheres  | 217                    | 1 A g <sup>-1</sup>   | 95.5% (2000)                         | S2               |
| ZnCo <sub>2</sub> O <sub>4</sub> nanoflakes    | 146.664                | 2 mA cm <sup>-1</sup> | 95.1% (2000)                         | S3               |
| Peony-like ZnCo <sub>2</sub> O <sub>4</sub>    | 242                    | 1 A g <sup>-1</sup>   | 155.6% (3000)                        | S4               |
| ZnCo <sub>2</sub> O <sub>4</sub> microspheres  | 284                    | 1 A g <sup>-1</sup>   | 145% (2000)                          | S5               |
| ZnCo <sub>2</sub> O <sub>4</sub> nanowires     | 132                    | 5 A g <sup>-1</sup>   |                                      | S6               |
| ZnCo <sub>2</sub> O <sub>4</sub> HTNs          | 181                    | 0.5 A g <sup>-1</sup> | 97.42% (10000)                       | <b>This work</b> |

## References

- S1 S. Chen, M. Xue, Y. Li, Y. Pan, L. Zhu, D. Zhang, Q. Fang and S. Qiu, *Inorg. Chem. Front.*, 2015, **2**, 177-183.
- S2 Y. Gai, Y. Shang, L. Gong, L. Su, L. Hao, F. Dong and J. Li, *RSC Adv.*, 2017, **7**, 1038-1044.
- S3 G. J. H. Lim, X. Liu, C. Guan and J. Wang, *Electrochim. Acta*, 2018, **291**, 177-187.
- S4 Y. Shang, T. Xie, Y. Gai, L. Su, L. Gong, H. Lv and F. Dong, *Electrochim. Acta*, 2017, **253**, 281-290.
- S5 Y. Shang, T. Xie, C. Ma, L. Su, Y. Gai, J. Liu and L. Gong, *Electrochim. Acta*, 2018, **286**, 103-113.
- S6 Y. Zhou, L. Chen, Y. Jiao, Z. Li and Y. Gao, *Electrochim. Acta*, 2019, **299**, 388-394.
